# Supplementary material for: Pain in Long-Term Cancer Survivors: Prevalence and Impact in a Cohort Composed Mostly of Breast Cancer Survivors
Source: MDPI journal article supplement (doi:10.3390/cancers16081581), 2024-04-20
Supplement: s1 [file s1]

## **xTitle page**

**Title:** Pain in Long-Term Cancer Survivors: A Cohort Study of Prevalence and Impact

### **Authors**

Concepción Pérez\*<sup>a</sup>, Dolores Ochoa\*<sup>a</sup>, Noelia Sánchez<sup>a</sup>, Ana-Isabel Ballesteros<sup>b</sup>, Olga Donay<sup>b</sup>, Isabel López<sup>a</sup>, Rebeca Mondéjar<sup>b</sup>, Thiago Carnaval<sup>c</sup>, Jesús Villoria<sup>c</sup>, Ramón Colomer<sup>b</sup>

<sup>a</sup> Pain Clinic, Hospital de La Princesa, Madrid, Spain

<sup>b</sup> Department of Clinical Oncology, Hospital de la Princesa, Madrid, Spain

<sup>c</sup> Department of Design and Biometrics, Medixact, S.L., Alpedrete, Spain

\* Contributed equally

**Short title:** Pain Prevalence and Impact in Long-Term Cancer Survivors

### **Address for correspondence**

Concepción Pérez, Pain Clinic, Hospital de La Princesa, calle de Diego de León 62, 28006, Madrid, Spain, email: concha.phite@gmail.com.

**Category of submission:** Original article.

**Funding sources:** This research has received funds from Grünenthal Pharma S.A., who did not have any direct corporate role in the design, analysis, interpretation of results, or preparation of the manuscript.

**Conflict of interest disclosures:** The authors do not have any conflict of interest to report.

**Significance:** Pain in long-term cancer survivors is associated to reductions of quality of life as well as emotional and professional performance. The neuropathic component is often underdiagnosed and/or undertreated. Adopting appropriate neuropathic pain diagnostic tools should be standard clinical practice and targeting the neuropathic component seems a good and underused therapeutic approach to improve cancer survivors' health outcomes.

## **Table of Contents**

|                             |    |
|-----------------------------|----|
| Title page .....            | 1  |
| Table of Contents .....     | 3  |
| Supplementary Tables.....   | 4  |
| Supplementary Figures ..... | 17 |

## Supplementary Tables

**Table S1: Correlates of EQ-5D Quality of Life Index (multivariable linear Gaussian regression)**

|                                                      | 95% confidence interval |                    |                    |                  |
|------------------------------------------------------|-------------------------|--------------------|--------------------|------------------|
|                                                      | Estimate <sup>a</sup>   | Lower <sup>a</sup> | Upper <sup>a</sup> | P-value          |
| Intercept                                            | <b>1.14</b>             | <b>0.90</b>        | <b>1.38</b>        | <b>&lt;0.001</b> |
| Having probable neuropathic pain (DN4 $\geq$ 4)      | <b>-0.38</b>            | <b>-0.43</b>       | <b>-0.32</b>       | <b>&lt;0.001</b> |
| Having probable nociceptive pain (DN4<4)             | <b>-0.23</b>            | <b>-0.29</b>       | <b>-0.17</b>       | <b>&lt;0.001</b> |
| Age, change per additional year                      | 0.00                    | 0.00               | 0.00               | 0.705            |
| Male gender                                          | 0.02                    | -0.07              | 0.11               | 0.654            |
| BMI, change per 1-unit (kg/m <sup>2</sup> ) increase | <b>-0.01</b>            | <b>-0.01</b>       | <b>0.00</b>        | <b>0.002</b>     |
| Being married                                        | 0.00                    | -0.04              | 0.05               | 0.875            |
| Having paid job                                      | 0.06                    | 0.00               | 0.11               | 0.063            |
| Having superior studies                              | 0.01                    | -0.04              | 0.05               | 0.802            |
| Smoking or routine alcohol intake                    | -0.02                   | -0.07              | 0.03               | 0.418            |
| Having any chronic disease                           | -0.04                   | -0.09              | 0.00               | 0.056            |
| Time since cancer onset, chg. per year               | 0.00                    | -0.01              | 0.00               | 0.656            |
| Having had breast cancer                             | -0.02                   | -0.12              | 0.07               | 0.625            |
| Having had advanced cancer                           | -0.01                   | -0.07              | 0.05               | 0.669            |
| Two surgeries (vs. one or none)                      | 0.02                    | -0.03              | 0.06               | 0.534            |
| Three or more surgeries (vs. one or none)            | -0.05                   | -0.12              | 0.02               | 0.171            |
| One or two chemotherapies (vs. none)                 | 0.00                    | -0.08              | 0.09               | 0.951            |
| Three or more chemotherapies (vs. none)              | -0.02                   | -0.12              | 0.09               | 0.777            |
| Radiotherapy                                         | <b>-0.06</b>            | <b>-0.11</b>       | <b>-0.01</b>       | <b>0.025</b>     |
| Vinca alkaloids or platinum compounds                | 0.00                    | -0.09              | 0.09               | 0.986            |
| Taxanes                                              | -0.01                   | -0.07              | 0.04               | 0.629            |
| Anthracyclines                                       | 0.03                    | -0.07              | 0.14               | 0.548            |
| Nitrogen mustards                                    | 0.03                    | -0.08              | 0.14               | 0.625            |
| Aromatase inhibitors                                 | <b>0.07</b>             | <b>0.02</b>        | <b>0.12</b>        | <b>0.008</b>     |

Abbreviations: BMI: body mass index, chg.: change, kg: kilogram, m: metre.

<sup>a</sup> An identity link was used in this binary model; thus, the estimates are in the response scale.

**Table S2: Correlates of EQ-5D Health Status score (multivariable linear Gaussian regression)**

|                                                      | Estimate <sup>a</sup> | 95% confidence interval |                    | P-value          |
|------------------------------------------------------|-----------------------|-------------------------|--------------------|------------------|
|                                                      |                       | Lower <sup>a</sup>      | Upper <sup>a</sup> |                  |
| Intercept                                            | <b>89.44</b>          | <b>68.59</b>            | <b>110.29</b>      | <b>&lt;0.001</b> |
| Having probable neuropathic pain (DN4 $\geq$ 4)      | <b>-14.79</b>         | <b>-19.45</b>           | <b>-10.14</b>      | <b>&lt;0.001</b> |
| Having probable nociceptive pain (DN4<4)             | <b>-7.71</b>          | <b>-12.74</b>           | <b>-2.68</b>       | <b>0.003</b>     |
| Age, change per additional year                      | -0.12                 | -0.34                   | 0.10               | 0.303            |
| Male gender                                          | 4.78                  | -3.03                   | 12.59              | 0.230            |
| BMI, change per 1-unit (kg/m <sup>2</sup> ) increase | -0.20                 | -0.60                   | 0.21               | 0.341            |
| Being married                                        | 2.13                  | -1.58                   | 5.84               | 0.261            |
| Having paid job                                      | 2.65                  | -2.38                   | 7.69               | 0.302            |
| Having superior studies                              | 0.12                  | -3.93                   | 4.16               | 0.955            |
| Smoking or routine alcohol intake                    | -1.01                 | -5.31                   | 3.30               | 0.647            |
| Having any chronic disease                           | <b>-6.96</b>          | <b>-10.88</b>           | <b>-3.03</b>       | <b>0.001</b>     |
| Time since cancer onset, chg. per year               | -0.02                 | -0.38                   | 0.34               | 0.921            |
| Having had breast cancer                             | -1.14                 | -9.35                   | 7.06               | 0.785            |
| Having had advanced cancer                           | 0.83                  | -4.24                   | 5.89               | 0.750            |
| Two surgeries (vs. one or none)                      | 4.15                  | -0.06                   | 8.36               | 0.054            |
| Three or more surgeries (vs. one or none)            | 4.41                  | -1.65                   | 10.47              | 0.154            |
| One or two chemotherapies (vs. none)                 | 4.09                  | -3.36                   | 11.53              | 0.282            |
| Three or more chemotherapies (vs. none)              | 1.73                  | -7.52                   | 10.97              | 0.715            |
| Radiotherapy                                         | -4.25                 | -8.65                   | 0.16               | 0.059            |
| Vinca alkaloids or platinum compounds                | -1.51                 | -8.93                   | 5.91               | 0.689            |
| Taxanes                                              | -0.06                 | -4.58                   | 4.47               | 0.979            |
| Anthracyclines                                       | 0.67                  | -8.44                   | 9.77               | 0.886            |
| Nitrogen mustards                                    | 3.90                  | -5.55                   | 13.35              | 0.419            |
| Aromatase inhibitors                                 | 2.15                  | -2.36                   | 6.65               | 0.350            |

Abbreviations: BMI: body mass index, chg.: change, kg: kilogram, m: metre.

<sup>a</sup> An identity link was used in this binary model; thus, the estimates are in the response scale.

**Table S3: Correlates of HADS anxiety score (multivariable linear Gaussian regression)**

|                                                      | Estimate <sup>a</sup> | 95% confidence interval |                    | P-value          |
|------------------------------------------------------|-----------------------|-------------------------|--------------------|------------------|
|                                                      |                       | Lower <sup>a</sup>      | Upper <sup>a</sup> |                  |
| Intercept                                            | <b>10.17</b>          | <b>4.27</b>             | <b>16.07</b>       | <b>0.001</b>     |
| Having probable neuropathic pain (DN4 $\geq$ 4)      | <b>3.89</b>           | <b>2.56</b>             | <b>5.22</b>        | <b>&lt;0.001</b> |
| Having probable nociceptive pain (DN4<4)             | <b>1.92</b>           | <b>0.50</b>             | <b>3.33</b>        | <b>0.008</b>     |
| Age, change per additional year                      | <b>-0.07</b>          | <b>-0.13</b>            | <b>-0.01</b>       | <b>0.024</b>     |
| Male gender                                          | 0.70                  | -1.51                   | 2.92               | 0.535            |
| BMI, change per 1-unit (kg/m <sup>2</sup> ) increase | -0.02                 | -0.13                   | 0.09               | 0.714            |
| Being married                                        | 0.06                  | -0.99                   | 1.11               | 0.906            |
| Having paid job                                      | -0.64                 | -2.06                   | 0.77               | 0.374            |
| Having superior studies                              | -0.71                 | -1.85                   | 0.43               | 0.223            |
| Smoking or routine alcohol intake                    | 0.24                  | -0.98                   | 1.46               | 0.698            |
| Having any chronic disease                           | -0.23                 | -1.35                   | 0.89               | 0.687            |
| Time since cancer onset, chg. per year               | <b>0.10</b>           | <b>0.00</b>             | <b>0.20</b>        | <b>0.049</b>     |
| Having had breast cancer                             | 0.12                  | -2.22                   | 2.46               | 0.922            |
| Having had advanced cancer                           | 0.45                  | -0.99                   | 1.89               | 0.538            |
| Two surgeries (vs. one or none)                      | <b>-1.49</b>          | <b>-2.67</b>            | <b>-0.31</b>       | <b>0.014</b>     |
| Three or more surgeries (vs. one or none)            | -1.60                 | -3.33                   | 0.12               | 0.069            |
| One or two chemotherapies (vs. none)                 | -1.91                 | -4.02                   | 0.21               | 0.077            |
| Three or more chemotherapies (vs. none)              | -1.86                 | -4.48                   | 0.75               | 0.163            |
| Radiotherapy                                         | -0.81                 | -2.05                   | 0.43               | 0.202            |
| Vinca alkaloids or platinum compounds                | -1.00                 | -3.11                   | 1.10               | 0.351            |
| Taxanes                                              | 0.20                  | -1.08                   | 1.48               | 0.758            |
| Anthracyclines                                       | -0.98                 | -3.57                   | 1.62               | 0.460            |
| Nitrogen mustards                                    | 2.63                  | -0.08                   | 5.33               | 0.057            |
| Aromatase inhibitors                                 | -0.67                 | -1.93                   | 0.59               | 0.300            |

Abbreviations: BMI: body mass index, chg.: change, kg: kilogram, m: metre.

<sup>a</sup> An identity link was used in this binary model; thus, the estimates are in the response scale.

**Table S4: Correlates of HADS depression score (multivariable linear Gaussian regression)**

|                                                      | Estimate <sup>a</sup> | 95% confidence interval |                    | P-value          |
|------------------------------------------------------|-----------------------|-------------------------|--------------------|------------------|
|                                                      |                       | Lower <sup>a</sup>      | Upper <sup>a</sup> |                  |
| Intercept                                            | −0.52                 | −5.72                   | 4.68               | 0.844            |
| Having probable neuropathic pain (DN4≥4)             | <b>3.13</b>           | <b>1.95</b>             | <b>4.30</b>        | <b>&lt;0.001</b> |
| Having probable nociceptive pain (DN4<4)             | <b>1.76</b>           | <b>0.51</b>             | <b>3.00</b>        | <b>0.006</b>     |
| Age, change per additional year                      | 0.02                  | −0.04                   | 0.07               | 0.575            |
| Male gender                                          | 0.54                  | −1.44                   | 2.52               | 0.593            |
| BMI, change per 1-unit (kg/m <sup>2</sup> ) increase | <b>0.12</b>           | <b>0.02</b>             | <b>0.21</b>        | <b>0.023</b>     |
| Being married                                        | <b>−1.02</b>          | <b>−1.95</b>            | <b>−0.10</b>       | <b>0.030</b>     |
| Having paid job                                      | −1.04                 | −2.29                   | 0.21               | 0.103            |
| Having superior studies                              | −0.71                 | −1.72                   | 0.30               | 0.168            |
| Smoking or routine alcohol intake                    | 0.41                  | −0.67                   | 1.49               | 0.456            |
| Having any chronic disease                           | 0.68                  | −0.31                   | 1.67               | 0.180            |
| Time since cancer onset, chg. per year               | 0.07                  | −0.02                   | 0.16               | 0.133            |
| Having had breast cancer                             | −0.10                 | −2.17                   | 1.97               | 0.926            |
| Having had advanced cancer                           | 0.48                  | −0.79                   | 1.75               | 0.455            |
| Two surgeries (vs. one or none)                      | −0.62                 | −1.66                   | 0.43               | 0.247            |
| Three or more surgeries (vs. one or none)            | −0.39                 | −1.91                   | 1.13               | 0.612            |
| One or two chemotherapies (vs. none)                 | −1.07                 | −2.93                   | 0.79               | 0.261            |
| Three or more chemotherapies (vs. none)              | −1.34                 | −3.65                   | 0.97               | 0.255            |
| Radiotherapy                                         | −0.21                 | −1.30                   | 0.89               | 0.714            |
| Vinca alkaloids or platinum compounds                | −0.47                 | −2.33                   | 1.39               | 0.623            |
| Taxanes                                              | 0.95                  | −0.18                   | 2.08               | 0.099            |
| Anthracyclines                                       | −0.83                 | −3.11                   | 1.46               | 0.478            |
| Nitrogen mustards                                    | 1.41                  | −0.98                   | 3.79               | 0.248            |
| Aromatase inhibitors                                 | <b>−1.23</b>          | <b>−2.34</b>            | <b>−0.12</b>       | <b>0.030</b>     |

Abbreviations: BMI: body mass index, chg.: change, kg: kilogram, m: metre.

<sup>a</sup> An identity link was used in this binary model; thus, the estimates are in the response scale.

**Table S5: Correlates of HADS total score (multivariable linear Gaussian regression)**

|                                                      | Estimate <sup>a</sup> | 95% confidence interval |                    | P-value          |
|------------------------------------------------------|-----------------------|-------------------------|--------------------|------------------|
|                                                      |                       | Lower <sup>a</sup>      | Upper <sup>a</sup> |                  |
| Intercept                                            | 9.66                  | −0.24                   | 19.55              | 0.056            |
| Having probable neuropathic pain (DN4≥4)             | <b>7.01</b>           | <b>4.78</b>             | <b>9.24</b>        | <b>&lt;0.001</b> |
| Having probable nociceptive pain (DN4<4)             | <b>3.69</b>           | <b>1.32</b>             | <b>6.06</b>        | <b>0.002</b>     |
| Age, change per additional year                      | −0.06                 | −0.16                   | 0.05               | 0.279            |
| Male gender                                          | 0.97                  | −2.79                   | 4.74               | 0.611            |
| BMI, change per 1-unit (kg/m <sup>2</sup> ) increase | 0.10                  | −0.09                   | 0.29               | 0.308            |
| Being married                                        | −1.01                 | −2.77                   | 0.76               | 0.264            |
| Having paid job                                      | −1.68                 | −4.05                   | 0.70               | 0.167            |
| Having superior studies                              | −1.34                 | −3.26                   | 0.58               | 0.172            |
| Smoking or routine alcohol intake                    | 0.69                  | −1.36                   | 2.74               | 0.510            |
| Having any chronic disease                           | 0.38                  | −1.50                   | 2.26               | 0.691            |
| Time since cancer onset, chg. per year               | <b>0.17</b>           | <b>0.01</b>             | <b>0.34</b>        | <b>0.043</b>     |
| Having had breast cancer                             | −0.11                 | −4.04                   | 3.83               | 0.958            |
| Having had advanced cancer                           | 0.96                  | −1.45                   | 3.38               | 0.435            |
| Two surgeries (vs. one or none)                      | <b>−2.08</b>          | <b>−4.06</b>            | <b>−0.09</b>       | <b>0.040</b>     |
| Three or more surgeries (vs. one or none)            | −1.96                 | −4.85                   | 0.94               | 0.185            |
| One or two chemotherapies (vs. none)                 | −2.98                 | −6.52                   | 0.56               | 0.099            |
| Three or more chemotherapies (vs. none)              | −3.28                 | −7.67                   | 1.11               | 0.143            |
| Radiotherapy                                         | −0.95                 | −3.04                   | 1.13               | 0.370            |
| Vinca alkaloids or platinum compounds                | −1.54                 | −5.08                   | 2.00               | 0.394            |
| Taxanes                                              | 1.19                  | −0.96                   | 3.34               | 0.277            |
| Anthracyclines                                       | −1.80                 | −6.15                   | 2.56               | 0.418            |
| Nitrogen mustards                                    | 4.02                  | −0.52                   | 8.56               | 0.083            |
| Aromatase inhibitors                                 | −1.87                 | −3.99                   | 0.24               | 0.083            |

Abbreviations: BMI: body mass index, chg.: change, kg: kilogram, m: metre.

<sup>a</sup> An identity link was used in this binary model; thus, the estimates are in the response scale.



**Table S6: Correlates of PCS total score (multivariable linear Gaussian regression)**

|                                                      | Estimate <sup>a</sup> | 95% confidence interval |                    | P-value          |
|------------------------------------------------------|-----------------------|-------------------------|--------------------|------------------|
|                                                      |                       | Lower <sup>a</sup>      | Upper <sup>a</sup> |                  |
| Intercept                                            | 3.59                  | −8.44                   | 15.63              | 0.558            |
| Having probable neuropathic pain (DN4≥4)             | <b>13.07</b>          | <b>10.32</b>            | <b>15.81</b>       | <b>&lt;0.001</b> |
| Having probable nociceptive pain (DN4<4)             | <b>5.18</b>           | <b>2.30</b>             | <b>8.07</b>        | <b>&lt;0.001</b> |
| Age, change per additional year                      | −0.05                 | −0.18                   | 0.07               | 0.422            |
| Male gender                                          | 2.78                  | −1.85                   | 7.41               | 0.239            |
| BMI, change per 1-unit (kg/m <sup>2</sup> ) increase | 0.08                  | −0.15                   | 0.31               | 0.503            |
| Being married                                        | −0.79                 | −2.95                   | 1.38               | 0.476            |
| Having paid job                                      | −1.72                 | −4.63                   | 1.18               | 0.245            |
| Having superior studies                              | −2.15                 | −4.50                   | 0.21               | 0.074            |
| Smoking or routine alcohol intake                    | −0.47                 | −2.95                   | 2.00               | 0.708            |
| Having any chronic disease                           | <b>2.76</b>           | <b>0.46</b>             | <b>5.07</b>        | <b>0.019</b>     |
| Time since cancer onset, chg. per year               | −0.05                 | −0.26                   | 0.16               | 0.621            |
| Having had breast cancer                             | 3.17                  | −1.68                   | 8.02               | 0.200            |
| Having had advanced cancer                           | 1.01                  | −1.93                   | 3.95               | 0.499            |
| Two surgeries (vs. one or none)                      | <b>−2.90</b>          | <b>−5.34</b>            | <b>−0.47</b>       | <b>0.019</b>     |
| Three or more surgeries (vs. one or none)            | <b>−3.84</b>          | <b>−7.40</b>            | <b>−0.29</b>       | <b>0.034</b>     |
| One or two chemotherapies (vs. none)                 | 0.42                  | −3.93                   | 4.76               | 0.851            |
| Three or more chemotherapies (vs. none)              | 2.59                  | −2.77                   | 7.96               | 0.343            |
| Radiotherapy                                         | −0.67                 | −3.21                   | 1.87               | 0.604            |
| Vinca alkaloids or platinum compounds                | −0.78                 | −5.14                   | 3.59               | 0.728            |
| Taxanes                                              | 0.16                  | −2.44                   | 2.77               | 0.903            |
| Anthracyclines                                       | 0.37                  | −4.90                   | 5.65               | 0.889            |
| Nitrogen mustards                                    | −0.07                 | −5.56                   | 5.42               | 0.979            |
| Aromatase inhibitors                                 | <b>−3.62</b>          | <b>−6.21</b>            | <b>−1.04</b>       | <b>0.006</b>     |

Abbreviations: BMI: body mass index, chg.: change, kg: kilogram, m: metre.

<sup>a</sup> An identity link was used in this binary model; thus, the estimates are in the response scale.

**Table S7: Correlates of WPAI-GH paid employment (multivariable logistic regression)**

|                                                      | Estimate <sup>a</sup> | 95% confidence interval |                    | P-value          |
|------------------------------------------------------|-----------------------|-------------------------|--------------------|------------------|
|                                                      |                       | Lower <sup>a</sup>      | Upper <sup>a</sup> |                  |
| Intercept                                            | <b>14.67</b>          | <b>8.55</b>             | <b>20.80</b>       | <b>&lt;0.001</b> |
| Having probable neuropathic pain (DN4 $\geq$ 4)      | <b>-1.47</b>          | <b>-2.66</b>            | <b>-0.27</b>       | <b>0.016</b>     |
| Having probable nociceptive pain (DN4<4)             | 0.13                  | -1.10                   | 1.36               | 0.839            |
| Age, change per additional year                      | <b>-0.25</b>          | <b>-0.33</b>            | <b>-0.17</b>       | <b>&lt;0.001</b> |
| Male gender                                          | 2.47                  | -0.41                   | 5.35               | 0.093            |
| BMI, change per 1-unit (kg/m <sup>2</sup> ) increase | -0.02                 | -0.12                   | 0.08               | 0.746            |
| Being married                                        | <b>-0.94</b>          | <b>-1.84</b>            | <b>-0.03</b>       | <b>0.043</b>     |
| Having paid job                                      | -0.04                 | -1.09                   | 1.01               | 0.947            |
| Having superior studies                              | 0.06                  | -0.89                   | 1.00               | 0.907            |
| Smoking or routine alcohol intake                    | -0.15                 | -1.10                   | 0.80               | 0.756            |
| Having any chronic disease                           | -0.04                 | -0.14                   | 0.06               | 0.429            |
| Time since cancer onset, chg. per year               | 0.77                  | -2.20                   | 3.73               | 0.612            |
| Having had breast cancer                             | -0.05                 | -1.25                   | 1.15               | 0.933            |
| Having had advanced cancer                           | 0.97                  | -0.07                   | 2.01               | 0.068            |
| Two surgeries (vs. one or none)                      | 1.08                  | -0.51                   | 2.67               | 0.183            |
| Three or more surgeries (vs. one or none)            | 0.22                  | -1.67                   | 2.11               | 0.821            |
| One or two chemotherapies (vs. none)                 | -0.12                 | -2.41                   | 2.17               | 0.918            |
| Three or more chemotherapies (vs. none)              | -0.40                 | -1.51                   | 0.72               | 0.484            |
| Radiotherapy                                         | -0.80                 | -3.06                   | 1.47               | 0.491            |
| Vinca alkaloids or platinum compounds                | -0.14                 | -1.22                   | 0.94               | 0.797            |
| Taxanes                                              | -1.74                 | -3.88                   | 0.40               | 0.110            |
| Anthracyclines                                       | <b>2.24</b>           | <b>0.12</b>             | <b>4.35</b>        | <b>0.039</b>     |
| Nitrogen mustards                                    | -0.75                 | -1.79                   | 0.30               | 0.163            |
| Aromatase inhibitors                                 | <b>14.67</b>          | <b>8.55</b>             | <b>20.80</b>       | <b>&lt;0.001</b> |

Abbreviations: BMI: body mass index, chg.: change, kg: kilogram, m: metre.

<sup>a</sup> A logit link was used in this binary model; thus, the estimates are log odds ratios.

**Table S8: Correlates of WPAI-GH presenteeism score (multivariable linear Gaussian regression)**

|                                                      | Estimate <sup>a</sup> | 95% confidence interval |                    | P-value      |
|------------------------------------------------------|-----------------------|-------------------------|--------------------|--------------|
|                                                      |                       | Lower <sup>a</sup>      | Upper <sup>a</sup> |              |
| Intercept                                            | <b>85.70</b>          | <b>29.26</b>            | <b>142.15</b>      | <b>0.003</b> |
| Having probable neuropathic pain (DN4 $\geq$ 4)      | 1.16                  | -11.11                  | 13.42              | 0.853        |
| Having probable nociceptive pain (DN4<4)             | 3.66                  | -9.42                   | 16.74              | 0.584        |
| Age, change per additional year                      | <b>-1.03</b>          | <b>-1.76</b>            | <b>-0.29</b>       | <b>0.006</b> |
| Male gender                                          | -29.57                | -62.02                  | 2.87               | 0.074        |
| BMI, change per 1-unit (kg/m <sup>2</sup> ) increase | 0.68                  | -0.43                   | 1.78               | 0.232        |
| Being married                                        | <b>-10.12</b>         | <b>-19.52</b>           | <b>-0.73</b>       | <b>0.035</b> |
| Having paid job                                      | <b>-14.48</b>         | <b>-27.42</b>           | <b>-1.54</b>       | <b>0.028</b> |
| Having superior studies                              | -7.16                 | -17.67                  | 3.35               | 0.182        |
| Smoking or routine alcohol intake                    | <b>-9.76</b>          | <b>-18.64</b>           | <b>-0.88</b>       | <b>0.031</b> |
| Having any chronic disease                           | 0.38                  | -0.90                   | 1.65               | 0.562        |
| Time since cancer onset, chg. per year               | -29.39                | -63.00                  | 4.22               | 0.087        |
| Having had breast cancer                             | 2.04                  | -10.42                  | 14.51              | 0.748        |
| Having had advanced cancer                           | -1.68                 | -13.64                  | 10.28              | 0.783        |
| Two surgeries (vs. one or none)                      | 7.35                  | -8.66                   | 23.37              | 0.368        |
| Three or more surgeries (vs. one or none)            | 11.12                 | -12.65                  | 34.90              | 0.359        |
| One or two chemotherapies (vs. none)                 | 27.29                 | -1.64                   | 56.21              | 0.064        |
| Three or more chemotherapies (vs. none)              | 8.55                  | -5.24                   | 22.34              | 0.224        |
| Radiotherapy                                         | <b>-30.58</b>         | <b>-57.76</b>           | <b>-3.40</b>       | <b>0.027</b> |
| Vinca alkaloids or platinum compounds                | -5.49                 | -19.10                  | 8.11               | 0.429        |
| Taxanes                                              | -15.26                | -34.25                  | 3.73               | 0.115        |
| Anthracyclines                                       | 0.66                  | -22.43                  | 23.75              | 0.955        |
| Nitrogen mustards                                    | -11.09                | -22.80                  | 0.61               | 0.063        |
| Aromatase inhibitors                                 | <b>85.70</b>          | <b>29.26</b>            | <b>142.15</b>      | <b>0.003</b> |

Abbreviations: BMI: body mass index, chg.: change, kg: kilogram, m: metre.

<sup>a</sup> An identity link was used in this binary model; thus, the estimates are in the response scale.

**Table S9: Correlates of WPAI-GH disability score (multivariable linear Gaussian regression)**

|                                                      | Estimate <sup>a</sup> | 95% confidence interval |                    | P-value      |
|------------------------------------------------------|-----------------------|-------------------------|--------------------|--------------|
|                                                      |                       | Lower <sup>a</sup>      | Upper <sup>a</sup> |              |
| Intercept                                            | <b>-43.31</b>         | <b>-72.24</b>           | <b>-14.38</b>      | <b>0.003</b> |
| Having probable neuropathic pain (DN4 $\geq$ 4)      | 6.70                  | -0.57                   | 13.97              | 0.071        |
| Having probable nociceptive pain (DN4<4)             | <b>10.41</b>          | <b>2.63</b>             | <b>18.20</b>       | <b>0.009</b> |
| Age, change per additional year                      | <b>0.43</b>           | <b>0.13</b>             | <b>0.73</b>        | <b>0.004</b> |
| Male gender                                          | -0.60                 | -12.77                  | 11.56              | 0.923        |
| BMI, change per 1-unit (kg/m <sup>2</sup> ) increase | <b>1.00</b>           | <b>0.38</b>             | <b>1.63</b>        | <b>0.002</b> |
| Being married                                        | -1.58                 | -7.31                   | 4.14               | 0.588        |
| Having paid job                                      | 0.25                  | -6.04                   | 6.53               | 0.939        |
| Having superior studies                              | -2.17                 | -8.90                   | 4.57               | 0.528        |
| Smoking or routine alcohol intake                    | 0.50                  | -5.68                   | 6.67               | 0.875        |
| Having any chronic disease                           | -0.35                 | -0.90                   | 0.20               | 0.210        |
| Time since cancer onset, chg. per year               | 1.98                  | -10.86                  | 14.83              | 0.762        |
| Having had breast cancer                             | 6.28                  | -1.67                   | 14.23              | 0.121        |
| Having had advanced cancer                           | -4.15                 | -10.66                  | 2.37               | 0.212        |
| Two surgeries (vs. one or none)                      | -6.40                 | -15.91                  | 3.11               | 0.187        |
| Three or more surgeries (vs. one or none)            | <b>16.78</b>          | <b>5.12</b>             | <b>28.44</b>       | <b>0.005</b> |
| One or two chemotherapies (vs. none)                 | <b>17.92</b>          | <b>3.49</b>             | <b>32.35</b>       | <b>0.015</b> |
| Three or more chemotherapies (vs. none)              | 0.40                  | -6.45                   | 7.25               | 0.909        |
| Radiotherapy                                         | -0.60                 | -12.24                  | 11.03              | 0.919        |
| Vinca alkaloids or platinum compounds                | -2.57                 | -9.61                   | 4.47               | 0.474        |
| Taxanes                                              | 3.44                  | -10.83                  | 17.72              | 0.636        |
| Anthracyclines                                       | -12.97                | -27.84                  | 1.90               | 0.087        |
| Nitrogen mustards                                    | 2.27                  | -4.59                   | 9.13               | 0.517        |
| Aromatase inhibitors                                 | <b>-43.31</b>         | <b>-72.24</b>           | <b>-14.38</b>      | <b>0.003</b> |

Abbreviations: BMI: body mass index, chg.: change, kg: kilogram, m: metre.

<sup>a</sup> An identity link was used in this binary model; thus, the estimates are in the response scale.

**Table S10: Correlates of WPAI-Pain paid employment (multivariable logistic regression)**

|                                                      | 95% confidence interval |                    |                    | P-value          |
|------------------------------------------------------|-------------------------|--------------------|--------------------|------------------|
|                                                      | Estimate <sup>a</sup>   | Lower <sup>a</sup> | Upper <sup>a</sup> |                  |
| Intercept                                            | <b>11.47</b>            | <b>6.20</b>        | <b>16.73</b>       | <b>&lt;0.001</b> |
| Having probable neuropathic pain (DN4≥4)             | -0.85                   | -1.89              | 0.20               | 0.112            |
| Having probable nociceptive pain (DN4<4)             | -0.29                   | -1.45              | 0.87               | 0.623            |
| Age, change per additional year                      | <b>-0.21</b>            | <b>-0.27</b>       | <b>-0.14</b>       | <b>&lt;0.001</b> |
| Male gender                                          | <b>2.74</b>             | <b>0.03</b>        | <b>5.45</b>        | <b>0.048</b>     |
| BMI, change per 1-unit (kg/m <sup>2</sup> ) increase | -0.04                   | -0.13              | 0.05               | 0.411            |
| Being married                                        | <b>-1.07</b>            | <b>-1.91</b>       | <b>-0.22</b>       | <b>0.013</b>     |
| Having paid job                                      | 0.13                    | -0.83              | 1.09               | 0.794            |
| Having superior studies                              | -0.18                   | -1.05              | 0.69               | 0.689            |
| Smoking or routine alcohol intake                    | -0.13                   | -1.01              | 0.75               | 0.775            |
| Having any chronic disease                           | -0.05                   | -0.14              | 0.05               | 0.319            |
| Time since cancer onset, chg. per year               | 2.49                    | -0.24              | 5.23               | 0.074            |
| Having had breast cancer                             | 0.11                    | -0.97              | 1.19               | 0.846            |
| Having had advanced cancer                           | 0.59                    | -0.34              | 1.52               | 0.212            |
| Two surgeries (vs. one or none)                      | 0.35                    | -1.07              | 1.77               | 0.628            |
| Three or more surgeries (vs. one or none)            | 1.01                    | -0.73              | 2.75               | 0.256            |
| One or two chemotherapies (vs. none)                 | 0.54                    | -1.57              | 2.64               | 0.616            |
| Three or more chemotherapies (vs. none)              | -0.26                   | -1.29              | 0.77               | 0.618            |
| Radiotherapy                                         | 0.12                    | -1.92              | 2.16               | 0.905            |
| Vinca alkaloids or platinum compounds                | -0.58                   | -1.57              | 0.41               | 0.254            |
| Taxanes                                              | -1.50                   | -3.54              | 0.54               | 0.150            |
| Anthracyclines                                       | 1.53                    | -0.44              | 3.49               | 0.128            |
| Nitrogen mustards                                    | -0.60                   | -1.54              | 0.34               | 0.210            |
| Aromatase inhibitors                                 | <b>11.47</b>            | <b>6.20</b>        | <b>16.73</b>       | <b>&lt;0.001</b> |

Abbreviations: BMI: body mass index, chg.: change, kg: kilogram, m: metre.

<sup>a</sup> A logit link was used in this binary model; thus, the estimates are log odds ratios.

**Table S11: Correlates of WPAI-Pain disability score (multivariable linear Gaussian regression)**

|                                                      | Estimate <sup>a</sup> | 95% confidence interval |                    | P-value          |
|------------------------------------------------------|-----------------------|-------------------------|--------------------|------------------|
|                                                      |                       | Lower <sup>a</sup>      | Upper <sup>a</sup> |                  |
| Intercept                                            | -26.39                | -53.19                  | 0.40               | 0.054            |
| Having probable neuropathic pain (DN4 $\geq$ 4)      | <b>46.06</b>          | <b>39.36</b>            | <b>52.76</b>       | <b>&lt;0.001</b> |
| Having probable nociceptive pain (DN4<4)             | <b>31.40</b>          | <b>24.23</b>            | <b>38.58</b>       | <b>&lt;0.001</b> |
| Age, change per additional year                      | 0.16                  | -0.11                   | 0.43               | 0.255            |
| Male gender                                          | -9.09                 | -20.40                  | 2.22               | 0.115            |
| BMI, change per 1-unit (kg/m <sup>2</sup> ) increase | 0.40                  | -0.17                   | 0.97               | 0.171            |
| Being married                                        | 1.47                  | -3.80                   | 6.74               | 0.585            |
| Having paid job                                      | -1.64                 | -7.44                   | 4.16               | 0.580            |
| Having superior studies                              | 1.76                  | -4.45                   | 7.96               | 0.579            |
| Smoking or routine alcohol intake                    | 1.95                  | -3.75                   | 7.65               | 0.503            |
| Having any chronic disease                           | 0.28                  | -0.23                   | 0.79               | 0.277            |
| Time since cancer onset, chg. per year               | 0.93                  | -10.90                  | 12.77              | 0.877            |
| Having had breast cancer                             | 3.96                  | -3.41                   | 11.33              | 0.293            |
| Having had advanced cancer                           | -3.99                 | -9.99                   | 2.01               | 0.192            |
| Two surgeries (vs. one or none)                      | -5.43                 | -14.20                  | 3.34               | 0.225            |
| Three or more surgeries (vs. one or none)            | 5.97                  | -4.78                   | 16.71              | 0.276            |
| One or two chemotherapies (vs. none)                 | 9.44                  | -3.85                   | 22.73              | 0.164            |
| Three or more chemotherapies (vs. none)              | 1.97                  | -4.36                   | 8.30               | 0.542            |
| Radiotherapy                                         | -0.17                 | -10.92                  | 10.58              | 0.975            |
| Vinca alkaloids or platinum compounds                | 3.46                  | -3.05                   | 9.97               | 0.297            |
| Taxanes                                              | -5.67                 | -18.83                  | 7.48               | 0.398            |
| Anthracyclines                                       | -1.97                 | -15.67                  | 11.73              | 0.778            |
| Nitrogen mustards                                    | -4.45                 | -10.77                  | 1.87               | 0.168            |
| Aromatase inhibitors                                 | -26.39                | -53.19                  | 0.40               | 0.054            |

Abbreviations: BMI: body mass index, chg.: change, kg: kilogram, m: metre.

<sup>a</sup> An identity link was used in this binary model; thus, the estimates are in the response scale.

**Table S12: Correlates of Insomnia (multivariable logistic regression)**

|                                                      | Estimate <sup>a</sup> | 95% confidence interval |                    | P-value          |
|------------------------------------------------------|-----------------------|-------------------------|--------------------|------------------|
|                                                      |                       | Lower <sup>a</sup>      | Upper <sup>a</sup> |                  |
| Intercept                                            | -0.05                 | -3.24                   | 3.15               | 0.976            |
| Having probable neuropathic pain (DN4 $\geq$ 4)      | <b>1.44</b>           | <b>0.70</b>             | <b>2.17</b>        | <b>&lt;0.001</b> |
| Having probable nociceptive pain (DN4<4)             | <b>0.82</b>           | <b>0.07</b>             | <b>1.56</b>        | <b>0.032</b>     |
| Age, change per additional year                      | -0.02                 | -0.05                   | 0.02               | 0.303            |
| Male gender                                          | 0.07                  | -1.17                   | 1.31               | 0.912            |
| BMI, change per 1-unit (kg/m <sup>2</sup> ) increase | -0.02                 | -0.09                   | 0.04               | 0.450            |
| Being married                                        | 0.34                  | -0.23                   | 0.91               | 0.239            |
| Having paid job                                      | 0.22                  | -0.55                   | 1.00               | 0.576            |
| Having superior studies                              | -0.05                 | -0.67                   | 0.57               | 0.875            |
| Smoking or routine alcohol intake                    | 0.02                  | -0.64                   | 0.68               | 0.945            |
| Having any chronic disease                           | 0.35                  | -0.26                   | 0.95               | 0.263            |
| Time since cancer onset, chg. per year               | 0.04                  | -0.02                   | 0.10               | 0.156            |
| Having had breast cancer                             | 0.30                  | -0.97                   | 1.58               | 0.641            |
| Having had advanced cancer                           | -0.25                 | -1.05                   | 0.56               | 0.550            |
| Two surgeries (vs. one or none)                      | -0.40                 | -1.04                   | 0.25               | 0.229            |
| Three or more surgeries (vs. one or none)            | -0.36                 | -1.33                   | 0.61               | 0.463            |
| One or two chemotherapies (vs. none)                 | 0.93                  | -0.22                   | 2.08               | 0.112            |
| Three or more chemotherapies (vs. none)              | 0.96                  | -0.47                   | 2.39               | 0.190            |
| Radiotherapy                                         | -0.09                 | -0.77                   | 0.58               | 0.784            |
| Vinca alkaloids or platinum compounds                | -0.80                 | -1.96                   | 0.35               | 0.174            |
| Taxanes                                              | 0.04                  | -0.67                   | 0.75               | 0.919            |
| Anthracyclines                                       | -0.58                 | -2.00                   | 0.84               | 0.422            |
| Nitrogen mustards                                    | -0.03                 | -1.52                   | 1.46               | 0.971            |
| Aromatase inhibitors                                 | 0.35                  | -0.34                   | 1.04               | 0.318            |

Abbreviations: BMI: body mass index, chg.: change, kg: kilogram, m: metre.

<sup>a</sup> A logit link was used in this binary model; thus, the estimates are log odds ratios.

**Table S13: Correlates of Fatigue (multivariable logistic regression)**

|                                                      | Estimate <sup>a</sup> | 95% confidence interval |                    | P-value      |
|------------------------------------------------------|-----------------------|-------------------------|--------------------|--------------|
|                                                      |                       | Lower <sup>a</sup>      | Upper <sup>a</sup> |              |
| Intercept                                            | -1.85                 | -5.13                   | 1.43               | 0.269        |
| Having probable neuropathic pain (DN4 $\geq$ 4)      | <b>1.05</b>           | <b>0.32</b>             | <b>1.79</b>        | <b>0.005</b> |
| Having probable nociceptive pain (DN4<4)             | 0.36                  | -0.41                   | 1.12               | 0.359        |
| Age, change per additional year                      | 0.00                  | -0.03                   | 0.04               | 0.845        |
| Male gender                                          | -0.64                 | -1.85                   | 0.56               | 0.297        |
| BMI, change per 1-unit (kg/m <sup>2</sup> ) increase | 0.04                  | -0.02                   | 0.10               | 0.210        |
| Being married                                        | -0.41                 | -0.99                   | 0.17               | 0.163        |
| Having paid job                                      | 0.28                  | -0.50                   | 1.06               | 0.489        |
| Having superior studies                              | 0.35                  | -0.27                   | 0.98               | 0.269        |
| Smoking or routine alcohol intake                    | -0.08                 | -0.76                   | 0.60               | 0.810        |
| Having any chronic disease                           | <b>0.64</b>           | <b>0.02</b>             | <b>1.25</b>        | <b>0.042</b> |
| Time since cancer onset, chg. per year               | -0.04                 | -0.10                   | 0.02               | 0.202        |
| Having had breast cancer                             | -0.73                 | -2.04                   | 0.59               | 0.280        |
| Having had advanced cancer                           | -0.28                 | -1.06                   | 0.50               | 0.485        |
| Two surgeries (vs. one or none)                      | -0.25                 | -0.90                   | 0.41               | 0.461        |
| Three or more surgeries (vs. one or none)            | 0.11                  | -0.85                   | 1.07               | 0.818        |
| One or two chemotherapies (vs. none)                 | 0.78                  | -0.41                   | 1.96               | 0.200        |
| Three or more chemotherapies (vs. none)              | <b>1.54</b>           | <b>0.07</b>             | <b>3.00</b>        | <b>0.040</b> |
| Radiotherapy                                         | 0.62                  | -0.08                   | 1.32               | 0.083        |
| Vinca alkaloids or platinum compounds                | -0.53                 | -1.70                   | 0.64               | 0.372        |
| Taxanes                                              | -0.06                 | -0.76                   | 0.64               | 0.861        |
| Anthracyclines                                       | <b>-1.81</b>          | <b>-3.27</b>            | <b>-0.35</b>       | <b>0.015</b> |
| Nitrogen mustards                                    | 0.43                  | -1.08                   | 1.94               | 0.574        |
| Aromatase inhibitors                                 | 0.40                  | -0.29                   | 1.08               | 0.257        |

Abbreviations: BMI: body mass index, chg.: change, kg: kilogram, m: metre.

<sup>a</sup> A logit link was used in this binary model; thus, the estimates are log odds ratios.



Supplementary Figures

Figure S1: Frequencies of common chemotherapeutic agents by study cohort

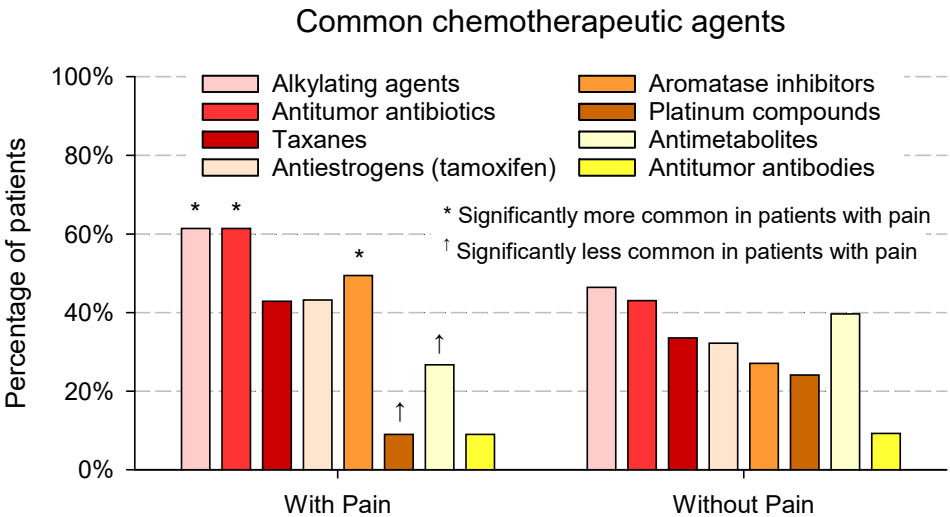

**Figure S2: Brief Pain Inventory (BPI) scores’ distribution by intensity category**

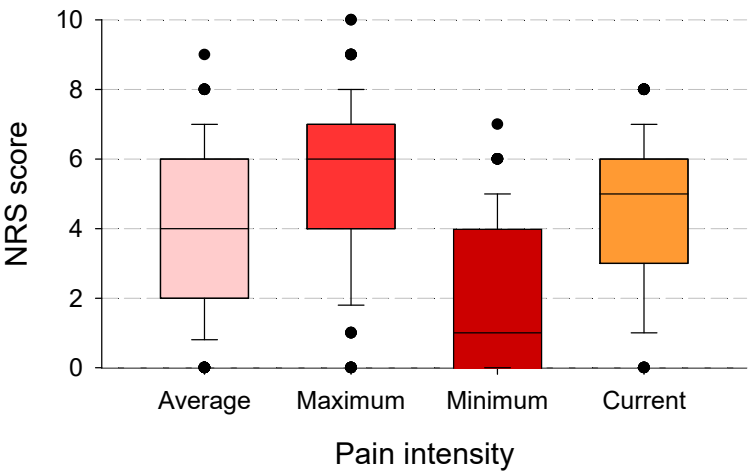

BPI: Brief Pain Inventory. Maximum, Minimum, Average, and “Right Now” intensities refer, respectively, to BPI’s questions 3, 4, 5, and 6.

**Figure S3: Frequencies of pain locations by pain type**

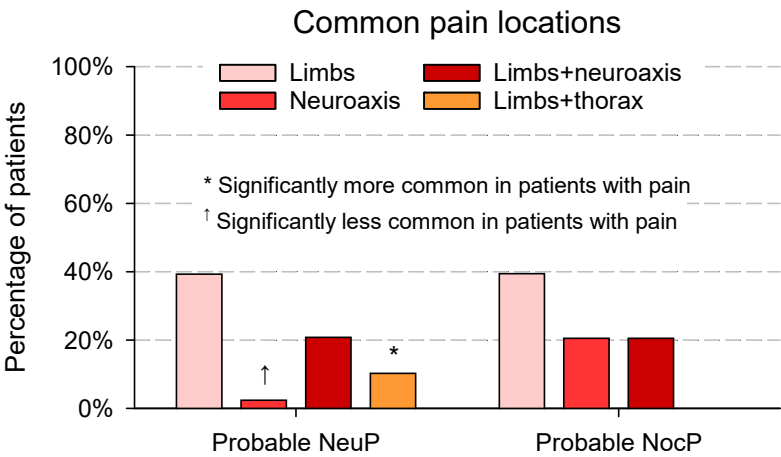

**Figure S4: EuroQoL 5 Dimensions**

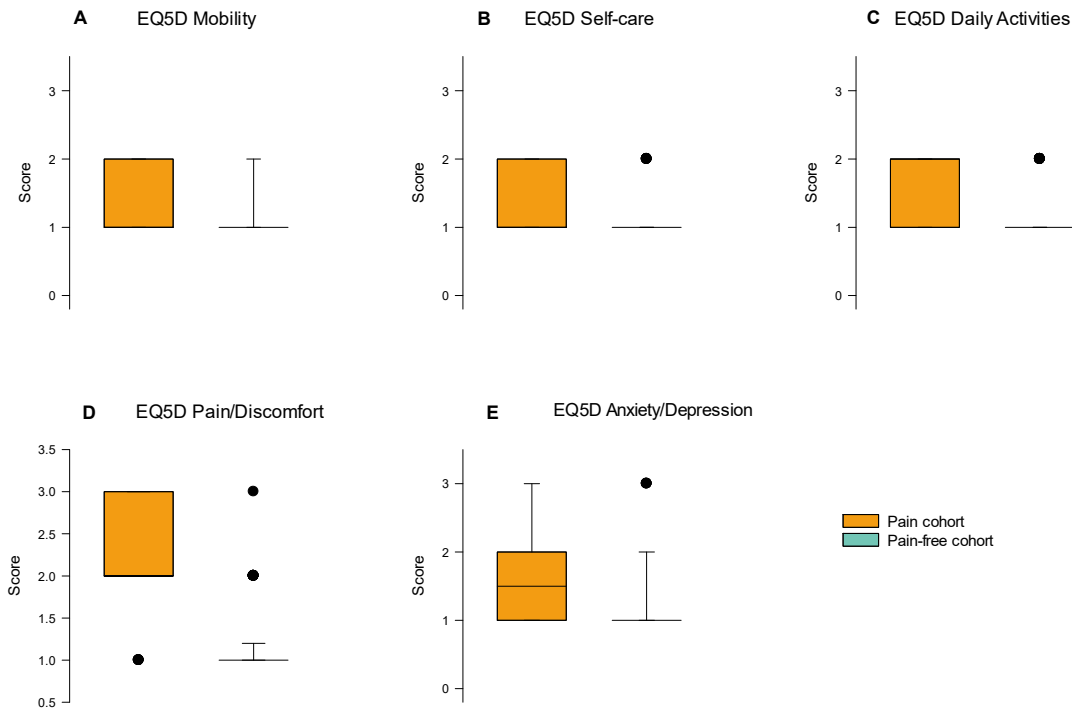

EuroQoL 5 Dimensions instrument. A) Mobility dimension; B) Self-care dimension; C) Daily activities dimension; D) Pain/Discomfort dimension; E) Anxiety/Depression dimension.

**Figure S5: EQ5D Health Status Visual Analogue Scale and EQ5D Pain/Discomfort**

**Domain**

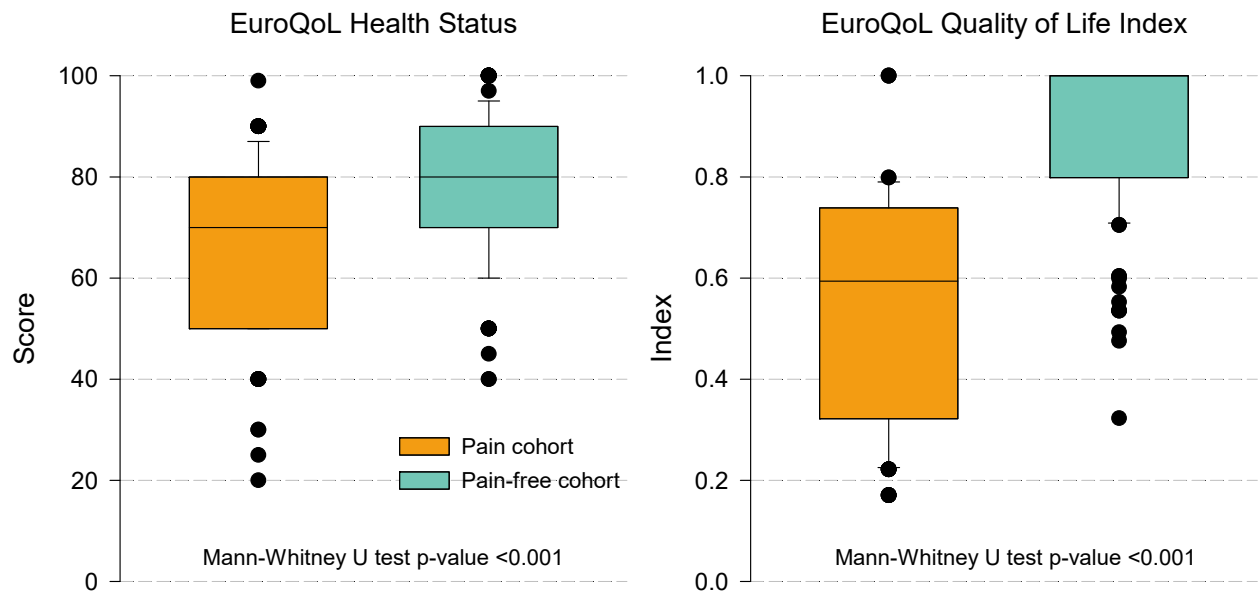

EuroQoL 5 Dimensions instrument. Health Status is scored from zero (worst health status possible) to 100 (best health status possible) and consists of a visual analogue scale. The Quality-of-Life Index is based on individual preferences and the index of preference values for each health state are obtained from general population or patient groups' studies. The Quality-of-Life Index oscillates from one (best health state) to zero (death), although there are negative values that correspond to those health states valued as worse than death.

**Figure S6: Number of Patients per category in each HADS subscale**

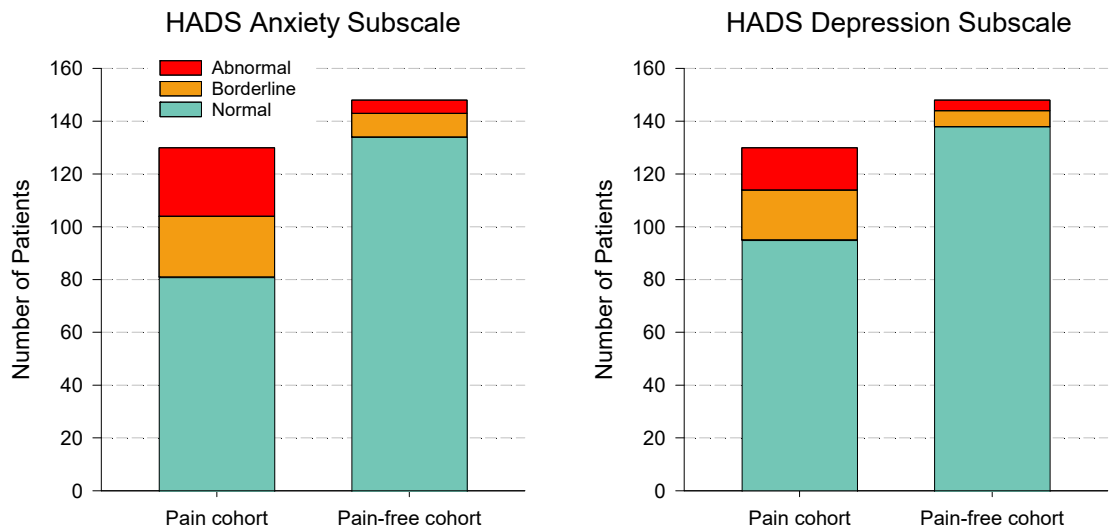

HADS: Hospital Anxiety and Depression Scale. Scores from 0 – 7 are considered normal; scores from 8 – 10 are considered borderline; scores from 11 – 21 are considered abnormal.

**Figure S7: Hospital Anxiety and Depression Scale (HADS) Scores**

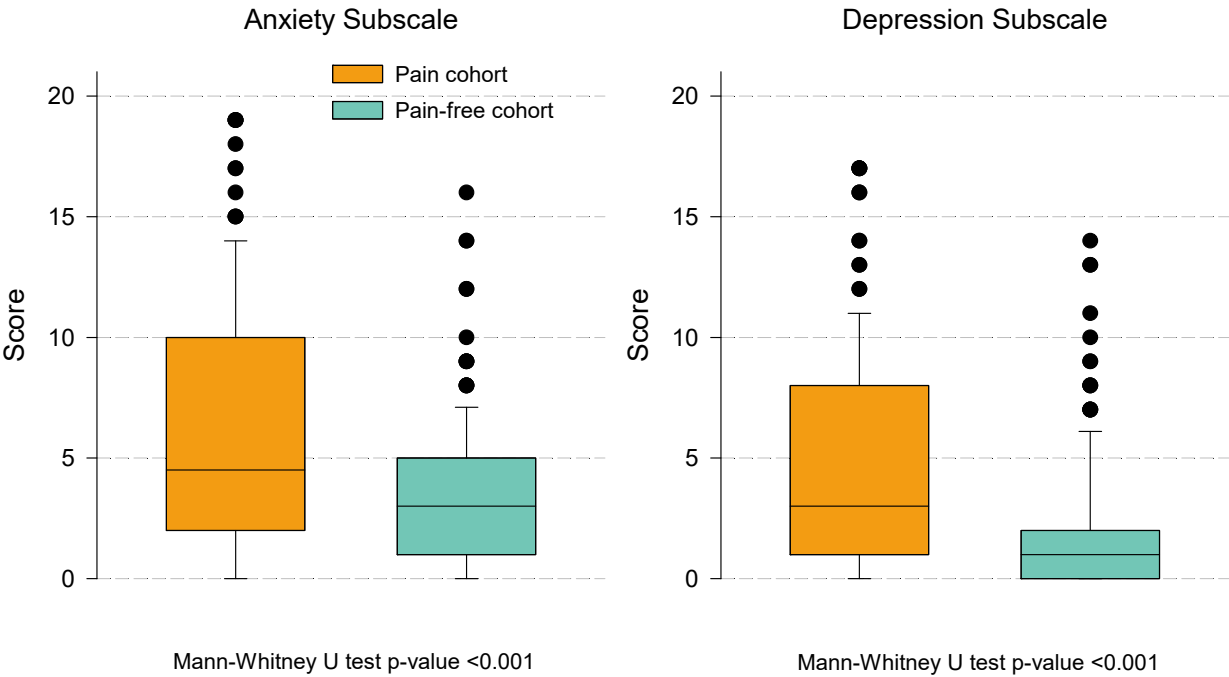

HADS: Hospital Anxiety and Depression Scale.

Figure S8: Components and total PCS scores

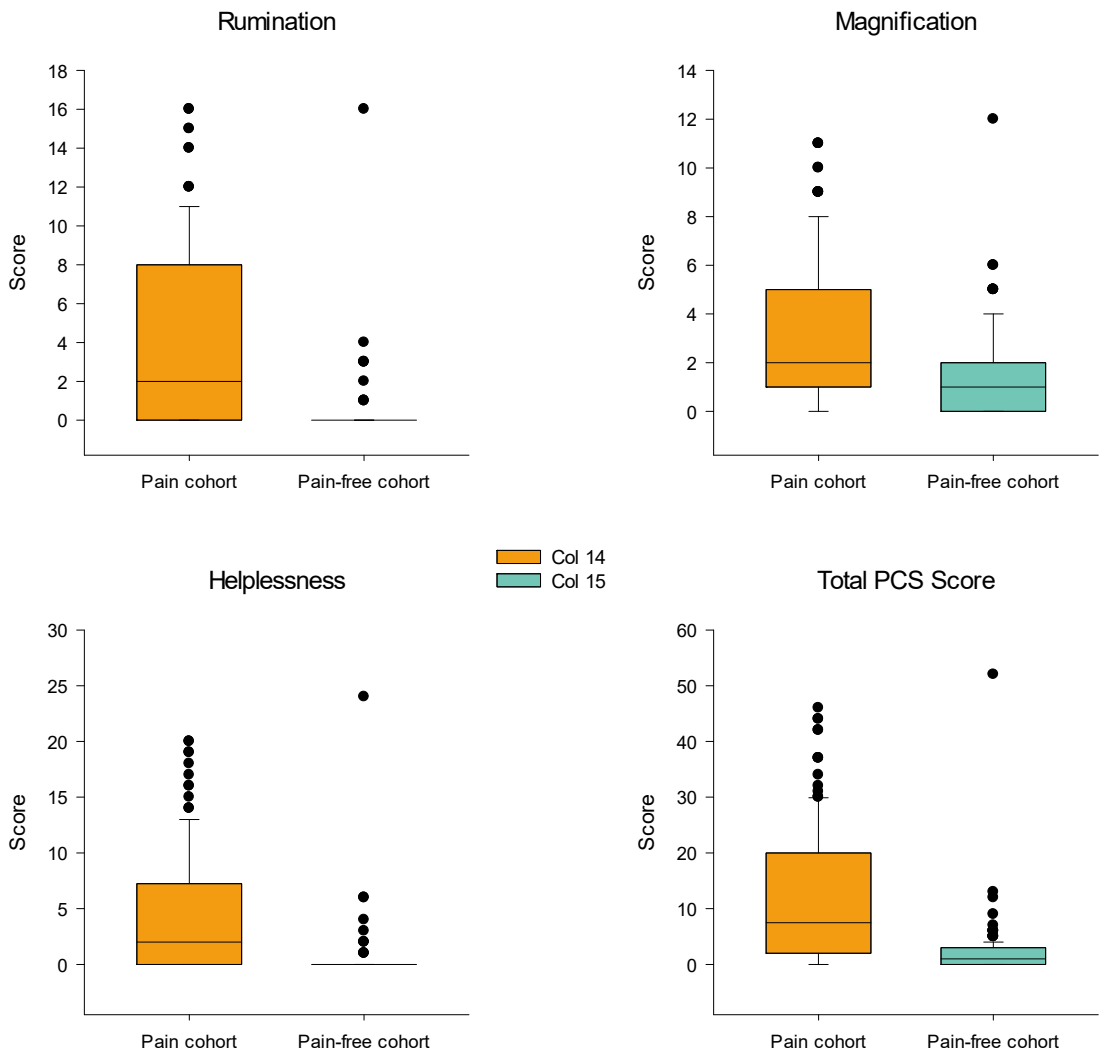

PCS: Pain Catastrophising Scale



**Figure S9: Absenteeism and Disability measured with the Work Productivity and Activity Impairment (WPAI) Questionnaire**

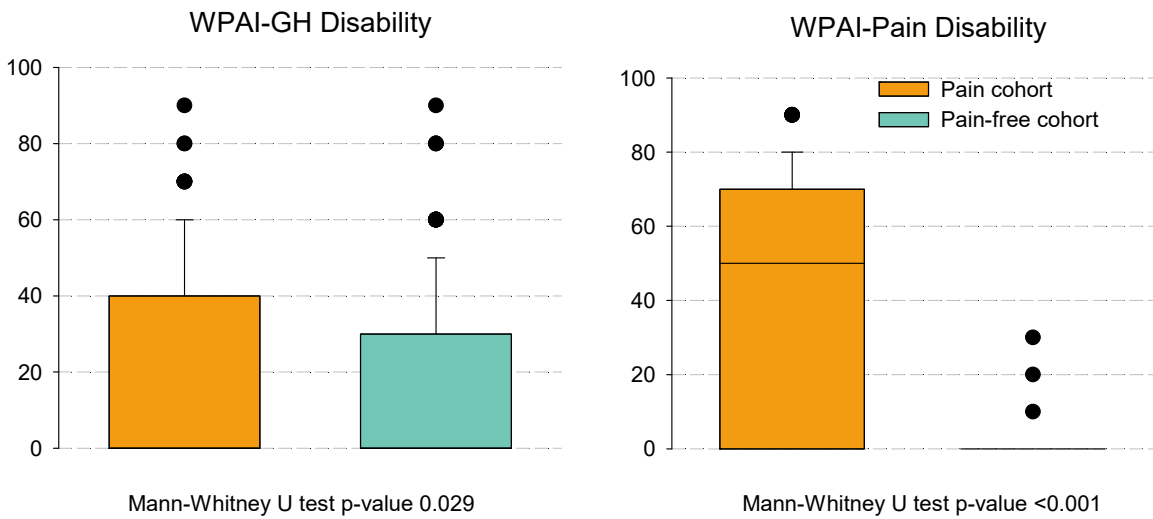

WPAI – GH: Work Productivity and Activity Impairment (WPAI) General Health Questionnaire; WPAI - Pain: WPAI Pain Questionnaire.
